# Supplementary material for: Pediatric vs Adult or Mixed Trauma Centers in Children Admitted to Hospitals Following Trauma: A Systematic Review and Meta-Analysis
Source: PubMed Central journal article supplement (PMC10507486; doi:10.1001/jamanetworkopen.2023.34266), 2023-09-18
Supplement: jamanetwopen-e2334266-s002.pdf [file jamanetwopen-e2334266-s002.pdf]

## Data Sharing Statement

Moore. Pediatric vs Adult or Mixed Trauma Centers in Children Admitted to Hospitals Following Trauma. *JAMA Netw Open*. Published September 18, 2023.

doi:10.1001/jamanetworkopen.2023.34266

### Data

**Data available:** Yes

**Data types:** Data (not involving human participants)

**How to access data:** Requests for data may be sent to [lynne.moore@fmed.ulaval.ca](mailto:lynne.moore@fmed.ulaval.ca)

**When available:** With publication

### Supporting Documents

**Document types:** Statistical/analytic code

**How to access documents:** Requests for analytic code may be sent to

[lynne.moore@fmed.ulaval.ca](mailto:lynne.moore@fmed.ulaval.ca)

**When available:** With publication

### Additional Information

**Who can access the data:** The data will be made available to researchers/trainees whose proposed use of the data has been approved

**Types of analyses:** The data will be made available for any purpose

**Mechanisms of data availability:** The data will be made available without investigator support
